# Supplementary material for: Effects of Arabidopsis wall associated kinase mutations on ESMERALDA1 and elicitor induced ROS
Source: PLOS journal article supplement (doi:10.1371/journal.pone.0251922), 2021-05-20

Fig 1

vs TAP

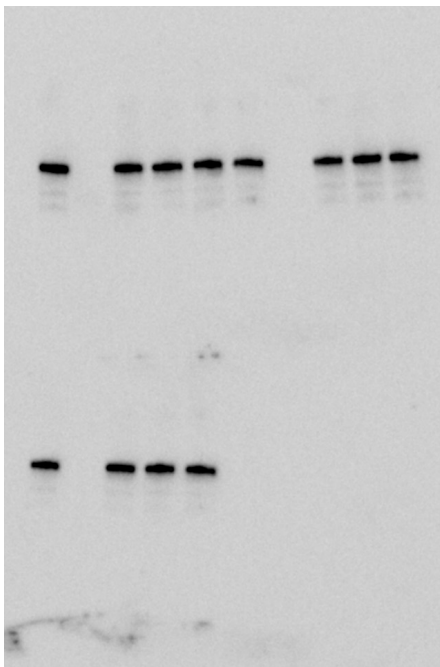

vs TUB

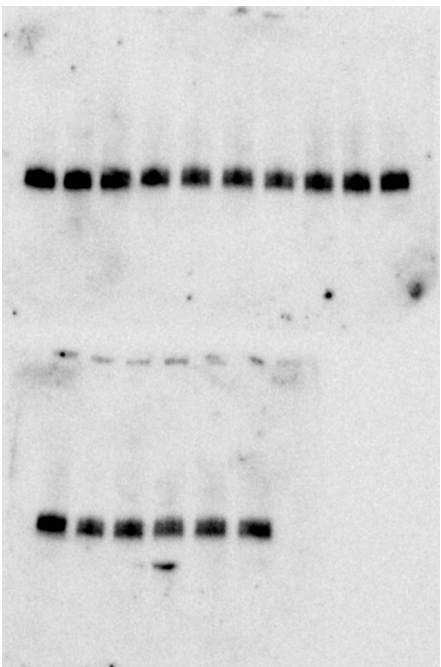

Fig 2

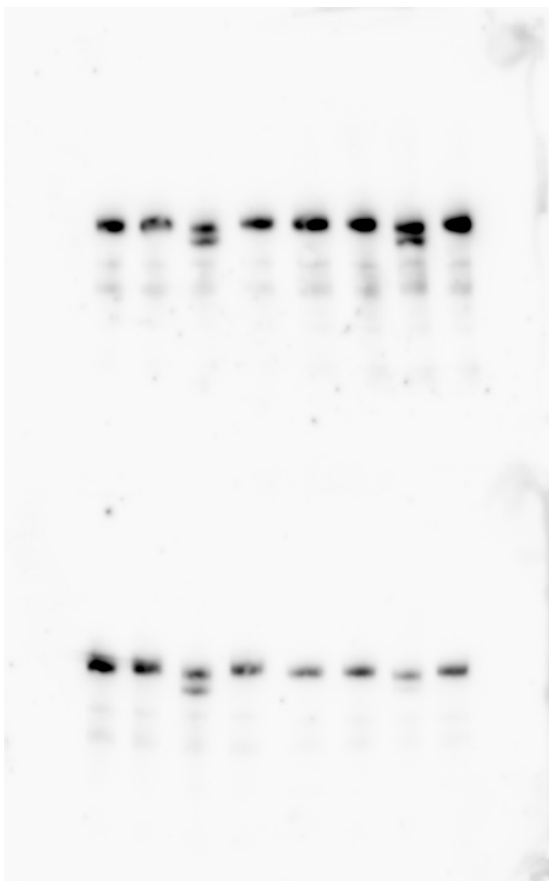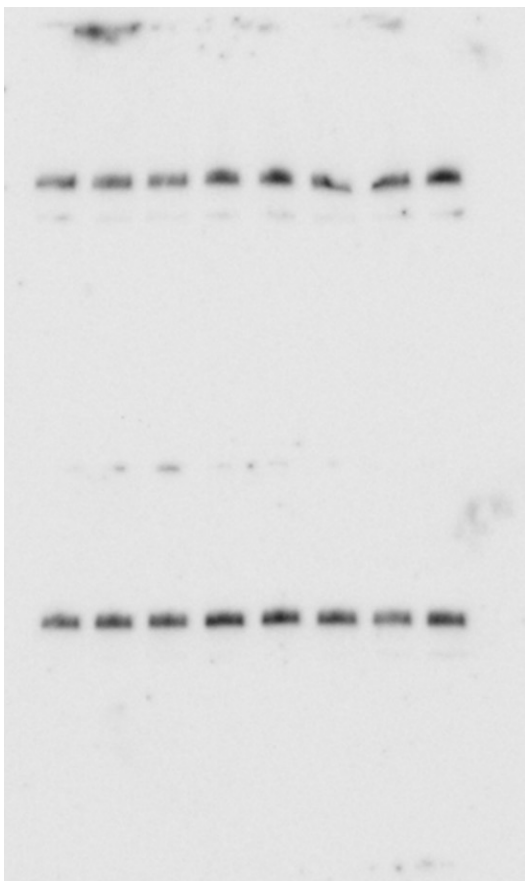

Supplement: S6 (10.1371/journal.pone.0251922.s006) [file journal.pone.0251922.s006]
